# Supplementary material
Source: Springer Nature journal article supplement (https://www.springermedizin.de/resource/supplementary/12889_2012_4899_MOESM3_ESM.pdf/9492036)

Ethiopia

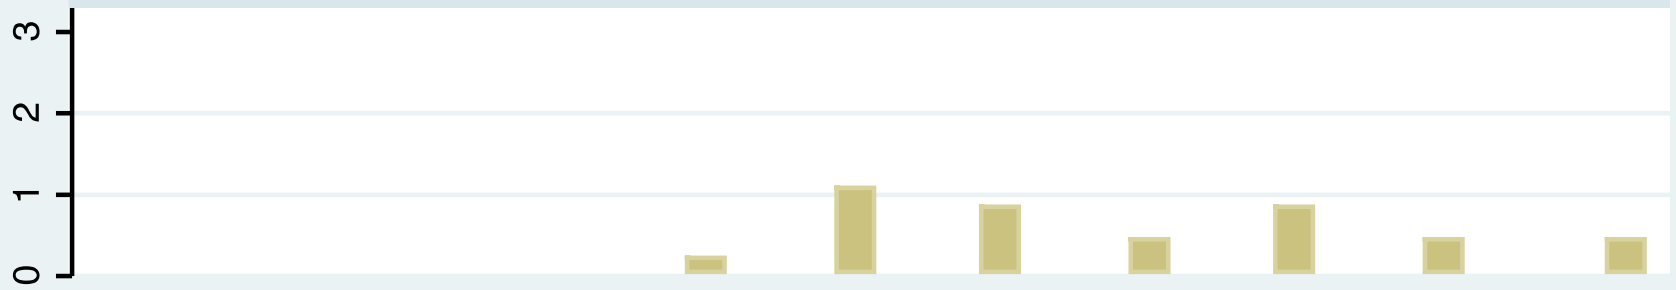

India

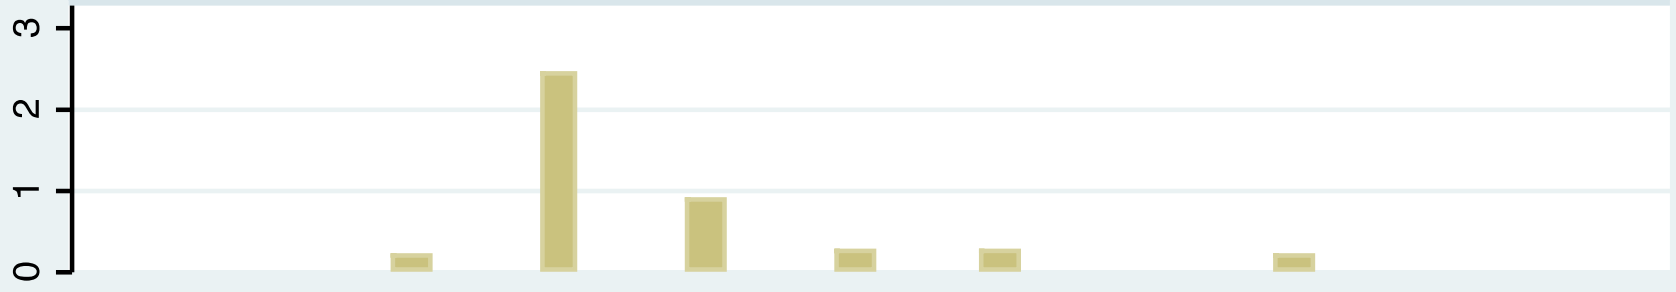

Peru

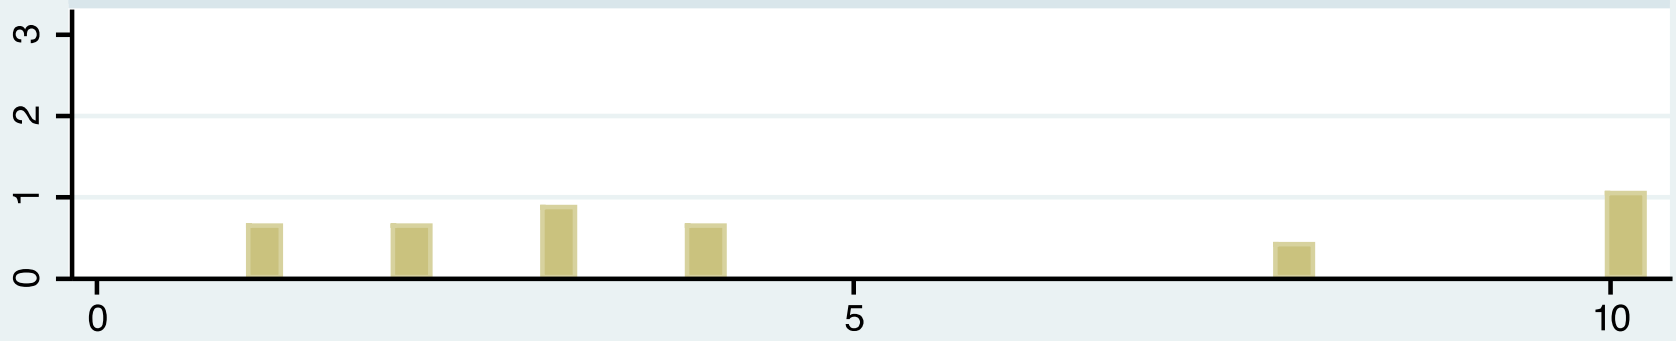

Population Size

Supplement: MOESM3 [file 9492036]
